## Volume 3 Fall Issue

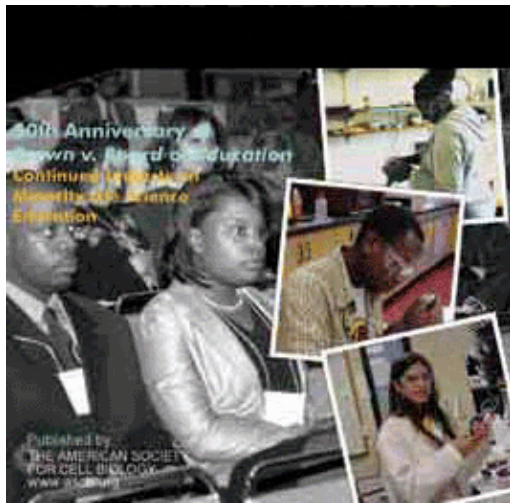

### Table of Contents

Use Arrows to Browse  
Previous Issues

### Contact CBE

8120 Woodmont Avenue Suite  
750  
Bethesda, Maryland 20814-  
2762

Phone: (301) 347-9300  
Fax: (301) 347-9350  
[cbe@ascb.org](mailto:cbe@ascb.org)

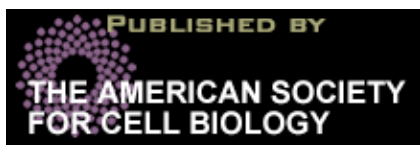

[Editorial Board Member Login](#)

## FEATURES

- **Video Views and Reviews: Golgi Export, Targeting, and Plasma Membrane Caveolae**  
by Christopher Watters
- **The 50th Anniversary of *Brown v. Board of Education*: Continued Impacts on Minority Life Science Education**  
by Irelene Ricks
- **Meeting Report: Outcomes from the Undergraduate Research Summit**  
by Thomas J. Wenzel
- **Review of: National Institutes of Health Curriculum Supplements: Human Genetic Variation and Cell Biology and Cancer, by Biological Sciences Curriculum Study and Videodiscovery**  
by Karen E. Kalumuck and Kristina Doss
- **Points of View: PowerPoint in the Classroom**  
by Diana Voss, David D. Keefe and James D. Willett, Cynthia Lanius, and Kim McDonald

## ARTICLES

- **The University of Alabama at Birmingham Center for Community Outreach Development Summer Science Institute Program: A 3-Yr**

Supported in part by an Undergraduate Science Education Program grant from the Howard Hughes Medical Institute

## Laboratory Research Experience for Inner-City, Secondary-Level Students

by Marilyn A. Niemann, Michael L. Miller, and Thelma Davis

### ESSAY

---

- **Use of Animation in Teaching Cell Biology**  
by Bradley J. Stith

### ARTICLES

---

- **Assessing Precollege Science Education Outreach Initiatives: A Funder's Perspective**  
by Debra A. Felix, Mark D. Hertle, Jill G. Conley, Lori B. Washington, and Peter J. Bruns

### ANNOUNCEMENTS

---

September 3–7, 2005, Sydney, Australia  
**15th International Society of Developmental Biologists Congress**

#### Submit Your Manuscript

Online Manuscript Submission

- **Instructions to Authors**
- **Top Ten Reasons to Publish in CBE**  
[pdf]

#### Other Information:

There are **6,450** registered users signed up to receive quarterly notification of new content.

[Become a registered user.](#)

[Order a Free CBE Poster](#)

## On the Cover [\[Printable Cover\]](#)

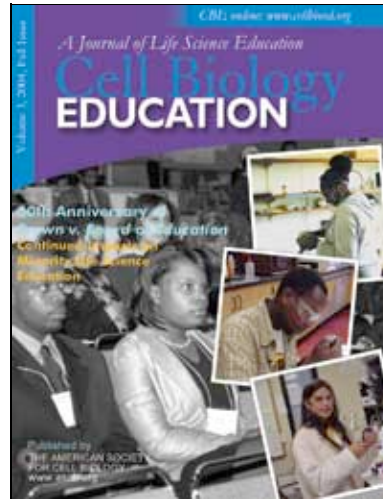

The cover highlights this issue's Feature which addresses the impact of the Brown v. Board of Education decision fifty years ago. The background image shows diverse

participants at a Minority Affairs Committee's session at the ASCB annual meeting. The three photos down the right side personalize research programs which foster minority participation in biology. From top to bottom: Nydia Brooks conducting research at Fisk University (top), Samuel Mbugua (middle) and Rosemary Flores (bottom) performed research at the University of Delaware. At the University of Delaware, grants from NIH, NSF and HHMI provide support to approximately 120 students who spend the summer conducting research; currently about half of these are minority students.
